# Supplementary material
Source: ML conference proceedings conference paper supplement (https://aclanthology.org/2026.semeval-1.63)
Supplement: SupplementaryMaterial [file Figure1.pdf › Narrative Similarity via Multi-Perspective E5-Mistral and Embedding Routing/figures/Figure1.pdf]

### Step 1: View Construction

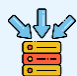

Input

Anchor  $a$

Candidates  $c_1$   $c_2$

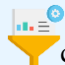

Preprocessing

clean/noremalize/sentence split

Theme  
raw text

Action  
verb sequence

Outcome  
ending sentence

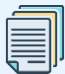

Output: 3 view texts (for  $a, c_1, c_2$ )

### Step 2: Similarity + Routing

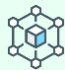

E5-Mistral-7B-instruct  
Encoder

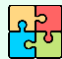

Fusion

$$v = 0.5v^{\text{theme}} + 0.25v^{\text{action}} + 0.25v^{\text{out}}$$

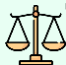

Similarity & Confidence

$$S(a, c_1) \quad S(a, c_2)$$

$$\Delta = |S(a, c_1) - S(a, c_2)|$$

$$\Delta \geq \tau?$$

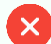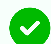

### Step 3: Inference + Decision

Prompt Construction  
anchor + two candidates  
view snippets  
constrained A/B output

Gemini-3-Flash  
Sampling + Voting

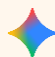

sample 3 times  
majority voting

Final Output  
Answer = A or B

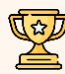

Argmax  $S(a, c)$
